# Supplementary material
Source: PubMed Central journal article supplement (PMC7778523)
Supplement: NIHMS1634948-supplement-1.pdf [file NIHMS1634948-supplement-1.pdf]

Supplementary Table 5

qPCR forward and reverse primer sequences.

| <b>Gene</b>    | <b>Forward Primer Sequence (5'-3')</b> | <b>Reverse Primer Sequence (5'-3')</b> |
|----------------|----------------------------------------|----------------------------------------|
| <i>Sox9</i>    | TCCACGAAGGGTCTCTTCTC                   | AGGAAGCTGGCAGACCAGTA                   |
| <i>Slc27a1</i> | CGCTTTCTGCGTATCGTCTG                   | GATGCACGGGATCGTGTCT                    |
| <i>Acan</i>    | GATCTACCGCTGTGAAGTGATG                 | GGGTGTAGCGTGTGGAAATAG                  |
| <i>Dcn</i>     | CAACCTTGCTAGACCTGCAAA                  | CTGGAGAGTTCTGGGCATTTTT                 |
| <i>Atp1a1</i>  | CCGTGGATAACCTCTGCTTCGT                 | CGCTGTGATTGGATGGTCTCCT                 |
| <i>Fgfr3</i>   | CTAAATGCCTCCCACGAAGAT                  | CTGAGGATGGAGCATCTGTTAC                 |
| <i>Tgfb1</i>   | GGTGGTATACTGAGACACCTTG                 | CCCAAGGAAAGGTAGGTGATAG                 |
| <i>Lox</i>     | CAAGGGACATCGGACTTCTTAC                 | TGGCATCAAGCAGGTCATAG                   |
| <i>Col2a1</i>  | CATCGAGTACCGATCACAGAAG                 | GCCCTATGTCCACACCAAAT                   |
| <i>Cilp</i>    | TGAAGTCCAAGGTCACCCAGCT                 | GGCGTTCTGAAAGCAGTCATGG                 |
| <i>Trpv4</i>   | CGTCCAAACCTGCGAATGAAGTTC               | CCTCCATCTCTTGTTGTCACTGG                |
| <i>Slc26a2</i> | GTGTCGGCTCAGTCATTACTAC                 | CACGAGGACCAGAAGACATAAA                 |
| <i>Sfrp5</i>   | CCGCTGGGACAAGAAGAATAA                  | GGTAGTAGAGGGAACAGGGATAG                |
| <i>Kcnp3</i>   | GCATACCACTGAGCAAGAGGGA                 | TGATGGCGCACCGTGGATAACT                 |
| <i>Adgrg6</i>  | GTGTTACCTGTGTTCTCTCTC                  | CCACGAACAAGACTGGGTATTA                 |
| <i>Frzb</i>    | TTATTTCTCTCTGGCTTCCTCTTC               | GGCGAGGCAGCATCTATTTA                   |
