# Supplementary material
Source: PubMed Central journal article supplement (PMC7778523)
Supplement: NIHMS1634948-supplement-3.pdf [file NIHMS1634948-supplement-3.pdf]

Supplementary Table 1. Genes, concepts, and themes associated with the ECM super cluster from DEGs upregulated in the AF. CompBio scores are shown in parenthesis.

| Tissue  | Theme                                                   | Gene                                                                                                                                                                                                                                                                                                                                                                                                                                                                                                                                                                                                                                                      |                                                                                                                                                                                                                                                                                                                                                                                                                                                                                                                                                                                                                      |                                                                                                                                                                                                                                                                                                                                                                                                                                                                                                                                                                                             | Concept                                                                                                                                                                                                                                                                                                                                                                                                                     |                                                                                                                                                                                                                                                                                                                                                                                                                    |
|---------|---------------------------------------------------------|-----------------------------------------------------------------------------------------------------------------------------------------------------------------------------------------------------------------------------------------------------------------------------------------------------------------------------------------------------------------------------------------------------------------------------------------------------------------------------------------------------------------------------------------------------------------------------------------------------------------------------------------------------------|----------------------------------------------------------------------------------------------------------------------------------------------------------------------------------------------------------------------------------------------------------------------------------------------------------------------------------------------------------------------------------------------------------------------------------------------------------------------------------------------------------------------------------------------------------------------------------------------------------------------|---------------------------------------------------------------------------------------------------------------------------------------------------------------------------------------------------------------------------------------------------------------------------------------------------------------------------------------------------------------------------------------------------------------------------------------------------------------------------------------------------------------------------------------------------------------------------------------------|-----------------------------------------------------------------------------------------------------------------------------------------------------------------------------------------------------------------------------------------------------------------------------------------------------------------------------------------------------------------------------------------------------------------------------|--------------------------------------------------------------------------------------------------------------------------------------------------------------------------------------------------------------------------------------------------------------------------------------------------------------------------------------------------------------------------------------------------------------------|
| AF - UP | ECM-Related<br>(1843.33)<br>33 Concepts,<br>89 Genes    | timp1 (612.227947)<br>acvr2a (537.844593)<br>mmp2 (352.562526)<br>adamts5 (286.852662)<br>mmp8 (280.699688)<br>adamts1 (236.535003)<br>acta2 (101.106559)<br>col3a1 (82.885000)<br>camp (76.450742)<br>acta1 (68.285366)<br>serpine1 (58.218303)<br>adam10 (53.857835)<br>id3 (44.748415)<br>id2 (44.459548)<br>adam8 (43.902986)<br>car1 (42.519976)<br>lcn2 (38.729749)<br>nov (34.120957)<br>pcolce (31.973806)<br>myoz2 (31.137381)<br>col5a2 (26.930686)<br>col5a1 (23.860792)<br>thsd4 (22.858018)<br>thy1 (21.578509)<br>krt19 (20.608352)<br>cilp (18.910779)<br>cd44 (18.829262)<br>ceacam1 (18.463877)<br>cd68 (18.279911)<br>ptprc (17.380703) | nbl1 (16.824268)<br>lrp1 (16.714537)<br>col18a1 (15.273221)<br>cxcr4 (14.098972)<br>mt1 (13.570924)<br>prg4 (12.378821)<br>ccna2 (11.633536)<br>gmfg (10.904592)<br>ly6a (10.617937)<br>cd53 (10.341455)<br>gja1 (9.107612)<br>cybb (8.910212)<br>tnfrsf1a (8.787090)<br>itgam (8.588916)<br>nt5e (8.492694)<br>slc4a1 (8.406977)<br>lft (8.141345)<br>fmln1 (8.140308)<br>cdk2 (8.122184)<br>itga11 (8.102874)<br>s100a8 (7.788115)<br>fndc4 (7.763835)<br>mtor (7.396756)<br>s100g (6.341115)<br>anxa7 (6.313889)<br>itgb2 (6.203705)<br>mpo (5.993937)<br>rbm15 (5.753340)<br>cd177 (5.662562)<br>prg2 (5.546844) | ncf1 (5.221649)<br>csrp3 (5.118033)<br>clec12a (5.026895)<br>elane (4.955869)<br>olfml2b (4.909754)<br>aspn (4.841995)<br>ceacam2 (4.751446)<br>csf3r (4.663411)<br>gypa (4.640726)<br>prkcb (4.335864)<br>ly6g (4.319558)<br>fpr1 (4.313344)<br>rac2 (4.166443)<br>emcn (4.162347)<br>lum (3.850878)<br>spi1 (3.824567)<br>s100a11 (3.709868)<br>cd37 (3.638900)<br>nfam1 (3.556899)<br>ly6c1 (3.506441)<br>cd33 (3.488967)<br>ptpn6 (3.412393)<br>lgals1 (3.409531)<br>s100a9 (3.348135)<br>des (3.246200)<br>myb (3.240623)<br>tmem173 (3.218413)<br>prc1 (3.023227)<br>cxcr2 (3.022913) | collagen (3.646197)<br>tgf-beta (3.721052)<br>factor-beta (3.742679)<br>fibronectin (3.806666)<br>ecm (3.936894)<br>metalloproteinase (3.991639)<br>metalloproteinases (4.133009)<br>smad2 (4.246263)<br>myofibroblasts (4.288810)<br>timp (4.405909)<br>smad (4.429273)<br>smad3 (4.598823)<br>morphogenetic (4.623340)<br>myofibroblast (4.630659)<br>tgfbeta (4.668659)<br>basement (4.681120)<br>collagenase (4.844961) | bmp (5.018716)<br>activin (5.019449)<br>superfamily (5.023064)<br>gelatinase (5.036883)<br>hydroxyproline (5.094928)<br>type-i (5.204692)<br>thrombospondin (5.271348)<br>transdifferentiation (5.359269)<br>hscs (5.363479)<br>follistatin (5.543978)<br>stromelysin (6.010261)<br>inhibin (6.021328)<br>type-ii (6.111235)<br>metallopeptidase (6.138494)<br>matrilysin (6.567857)<br>alpha-defensins (8.213786) |
|         | Amyloid Fibrils<br>(1335.98)<br>9 Concepts,<br>69 Genes | gmfg (283.495788)<br>saa2 (214.130815)<br>saa1 (209.646000)<br>col5a1 (129.945140)<br>chil3 (122.699158)<br>tyrobp (107.001631)<br>pcolce (97.046803)<br>col5a2 (96.707243)<br>itgam (74.530176)<br>adam10 (72.293998)<br>cd68 (68.450531)<br>cln5 (59.527633)<br>cybb (36.976124)<br>col3a1 (32.713914)<br>ly6c1 (30.451364)<br>ptprc (29.033897)<br>lrp1 (26.657230)<br>cllc1 (22.218654)<br>kcnn4 (20.910989)<br>cxcr4 (20.460192)<br>ly6g (20.411731)<br>lum (18.933472)<br>anxa1 (17.017862)                                                                                                                                                         | gpnmb (16.943106)<br>cxcr2 (16.360785)<br>tnfrsf1a (14.944413)<br>mmp8 (14.925052)<br>timp1 (14.358748)<br>gja1 (14.330784)<br>lrp8 (13.944636)<br>mmp2 (13.818302)<br>slurp1 (12.491792)<br>vcp (12.162038)<br>elane (11.852324)<br>acta1 (11.744921)<br>ncf1 (11.505722)<br>slc2a3 (10.536983)<br>ackr3 (10.320303)<br>hspb8 (9.101120)<br>tuba4a (8.877054)<br>s100a8 (8.475130)<br>hspb6 (8.322914)<br>dock2 (8.137158)<br>cd33 (7.903601)<br>slc1a4 (7.780038)<br>lcn2 (7.318269)                                                                                                                               | keap1 (7.158345)<br>lyz2 (6.700175)<br>fcer1g (6.562978)<br>htra2 (6.551572)<br>s100a9 (6.204698)<br>camkk2 (5.864645)<br>itgb2 (5.863657)<br>mtor (5.609613)<br>irak4 (5.550643)<br>thy1 (5.521960)<br>hspa1a (5.406575)<br>nov (4.950322)<br>cables1 (4.933898)<br>ndufa1 (4.616068)<br>prdx2 (4.513970)<br>ppp1r9b (4.154949)<br>gpx1 (3.748461)<br>ncf2 (3.536952)<br>cd44 (3.520448)<br>myh8 (3.451069)<br>ptpn6 (3.371863)<br>hist1h1c (3.255649)<br>nt5e (3.164766)                                                                                                                  | amyloid (3.675113)<br>microglia (3.678233)<br>microglial (3.938665)<br>neurodegenerative (4.131085)<br>fibrils (4.370457)                                                                                                                                                                                                                                                                                                   | glia (4.834059)<br>fibrillar (4.866332)<br>fibril (5.271661)<br>fractalkine (5.970808)                                                                                                                                                                                                                                                                                                                             |

Supplementary Table 2. Genes, concepts, and themes associated with the ECM super cluster from DEGs downregulated in the AF. CompBio scores are shown in parenthesis.

| Tissue    | Theme                                                             | Gene                                                                                                                                                                                                                                                                                                                      |                                                                                                                                                                                                                                                                                                      |                                                                                                                                                                                                                                              | Concept                                                                                                                                                                                                                                                                                                                                                                                                                                                                                                                                                                                                                                                                                                                                                                                                                                                                                                                                                                                                                                           |                                                                                                                                                                                                                                                                                                                                                                                                                                                                                                                                                                                                                                                                                                                                                                                                                                                                                                                                                                                                                       |
|-----------|-------------------------------------------------------------------|---------------------------------------------------------------------------------------------------------------------------------------------------------------------------------------------------------------------------------------------------------------------------------------------------------------------------|------------------------------------------------------------------------------------------------------------------------------------------------------------------------------------------------------------------------------------------------------------------------------------------------------|----------------------------------------------------------------------------------------------------------------------------------------------------------------------------------------------------------------------------------------------|---------------------------------------------------------------------------------------------------------------------------------------------------------------------------------------------------------------------------------------------------------------------------------------------------------------------------------------------------------------------------------------------------------------------------------------------------------------------------------------------------------------------------------------------------------------------------------------------------------------------------------------------------------------------------------------------------------------------------------------------------------------------------------------------------------------------------------------------------------------------------------------------------------------------------------------------------------------------------------------------------------------------------------------------------|-----------------------------------------------------------------------------------------------------------------------------------------------------------------------------------------------------------------------------------------------------------------------------------------------------------------------------------------------------------------------------------------------------------------------------------------------------------------------------------------------------------------------------------------------------------------------------------------------------------------------------------------------------------------------------------------------------------------------------------------------------------------------------------------------------------------------------------------------------------------------------------------------------------------------------------------------------------------------------------------------------------------------|
| AF - DOWN | ECM-Related-1<br>(26396.29)<br>12 Concepts,<br>28 Genes           | col11a1 (2098.882438)<br>col2a1 (1630.599860)<br>col11a2 (1277.967288)<br>col10a1 (1083.481099)<br>acan (917.538428)<br>col9a2 (902.907770)<br>col9a3 (274.739738)<br>sox9 (234.729013)<br>col27a1 (209.936683)<br>hapln1 (115.385095)                                                                                    | snai2 (91.810780)<br>lrp5 (54.800487)<br>sox5 (35.346951)<br>bmp5 (29.459357)<br>itga6 (26.174950)<br>fgfr3 (25.928760)<br>krt8 (25.715599)<br>trpc3 (22.293784)<br>s100b (15.026250)<br>fat1 (14.477513)                                                                                            | krtap5-1 (11.485184)<br>frzb (11.217982)<br>grem1 (10.484268)<br>il6 (9.495524)<br>gjb6 (9.112332)<br>chst11 (7.658601)<br>matn3 (6.776611)<br>slc26a2 (3.209043)                                                                            | col5a1 (1.859182)<br>col5a2 (1.874813)<br>col11a1 (1.930254)<br>col3a1 (1.997060)<br>col1a1 (2.093634)<br>collagens (2.280152)                                                                                                                                                                                                                                                                                                                                                                                                                                                                                                                                                                                                                                                                                                                                                                                                                                                                                                                    | col1a2 (2.300814)<br>col11a2 (2.521267)<br>xi (2.745857)<br>col6a1 (2.780897)<br>fibrillar (2.803952)<br>fn1 (3.013590)                                                                                                                                                                                                                                                                                                                                                                                                                                                                                                                                                                                                                                                                                                                                                                                                                                                                                               |
|           | Cartilage,<br>Articular<br>(25744.45)<br>83 Concepts,<br>40 Genes | col2a1 (1128.017938)<br>col10a1 (1080.111934)<br>acan (860.307287)<br>sox9 (815.726604)<br>sox5 (437.338281)<br>col9a2 (328.747043)<br>col11a2 (276.562423)<br>slc26a2 (256.343771)<br>col11a1 (236.981555)<br>fgfr3 (183.017668)<br>matn3 (127.501777)<br>hapln1 (111.513857)<br>col9a3 (100.142952)<br>sox8 (59.948448) | ucma (56.965981)<br>wisp3 (49.854167)<br>papss2 (46.153298)<br>trpc3 (28.831117)<br>col27a1 (27.622636)<br>bmp5 (23.725537)<br>lrp5 (23.174187)<br>sgalnact1 (16.351351)<br>trpv4 (15.743457)<br>frzb (14.275226)<br>chst11 (13.612511)<br>sfrp5 (12.922046)<br>il6 (12.912499)<br>snai2 (12.391289) | chadl (10.556435)<br>itga6 (9.523547)<br>trpm7 (7.506775)<br>scrg1 (7.463269)<br>prrg4 (7.353324)<br>clec4g (5.999290)<br>grem1 (5.859621)<br>gal3st2 (4.952021)<br>etv5 (3.580243)<br>fgfr1 (3.241588)<br>tnr (3.136109)<br>stc2 (3.045821) | chondrocytes (3.289268)<br>cartilage (3.307109)<br>chondrocyte (3.326771)<br>col2a1 (3.338902)<br>col10a1 (3.369533)<br>sox9 (3.400894)<br>chondrogenesis (3.415233)<br>chondrogenic (3.460794)<br>aggrecan (3.464150)<br>hypertrophic (3.496752)<br>articular (3.541992)<br>ossification (3.628928)<br>cartilaginous (3.701292)<br>runx2 (3.706490)<br>acan (3.709650)<br>endochondral (3.713542)<br>osteoarthritis (3.739690)<br>ihh (3.952844)<br>cartilage-specific (3.955506)<br>oa (3.961725)<br>comp (4.011701)<br>chondrocytic (4.012494)<br>mmp13 (4.102905)<br>epiphyseal (4.111043)<br>micromass (4.175520)<br>alcian (4.207284)<br>hyaline (4.209037)<br>osteogenesis (4.239771)<br>osteoarthritic (4.253466)<br>cartilages (4.270364)<br>chondrodysplasia (4.287202)<br>dysplasia (4.297080)<br>mscs (4.307354)<br>atdc5 (4.348169)<br>chondrocyte-specific (4.428309)<br>col (4.454092)<br>calcification (4.464701)<br>runt-related (4.493386)<br>pellet (4.499547)<br>oligomeric (4.510336)<br>osterix (4.612679)<br>ix (4.618798) | dwarfism (4.636578)<br>condylar (4.774255)<br>alp (4.788202)<br>col9a2 (4.798266)<br>stature (4.859589)<br>prehypertrophic (4.868729)<br>dysplasias (4.903125)<br>skeletogenesis (4.907638)<br>intramembranous (4.910145)<br>adamts5 (4.910365)<br>hmscs (4.911215)<br>chondrodysplasias (5.018934)<br>cbfa1 (5.043626)<br>mmp3 (5.052603)<br>c3h10t1 (5.087190)<br>fibrocartilage (5.114802)<br>oa-like (5.149760)<br>spondyloepiphyseal (5.171468)<br>metaphyseal (5.202255)<br>ocn (5.202709)<br>mmp1 (5.270881)<br>condensations (5.299069)<br>osx (5.307061)<br>adamts4 (5.337246)<br>non-collagenous (5.347214)<br>hmsc (5.364236)<br>opn (5.386362)<br>haploinsufficiency (5.422658)<br>bm-mscs (5.584857)<br>degradative (5.607887)<br>radiographically (5.610724)<br>runx3 (5.631284)<br>mgp (5.639234)<br>hif-2a (5.667425)<br>patella (5.720246)<br>osteocondrodysplasia (5.752396)<br>sed (5.781078)<br>gla (5.898991)<br>osteoarthropathy (6.038257)<br>co-culturing (6.107200)<br>non-lethal (6.165223) |

Supplementary Table 2. Continued

| Tissue    | Theme                                                         | Gene                                                                                                                                                                                                                                                                                                                     |                                                                                                                                                                                                                                                                                                                |                                                                                                                                                                                                                                                                                     | Concept                                                                                                                                                                                                                                                                                                                                                                                  |                                                                                                                                                                                                                                                                                                                                                                                                                       |
|-----------|---------------------------------------------------------------|--------------------------------------------------------------------------------------------------------------------------------------------------------------------------------------------------------------------------------------------------------------------------------------------------------------------------|----------------------------------------------------------------------------------------------------------------------------------------------------------------------------------------------------------------------------------------------------------------------------------------------------------------|-------------------------------------------------------------------------------------------------------------------------------------------------------------------------------------------------------------------------------------------------------------------------------------|------------------------------------------------------------------------------------------------------------------------------------------------------------------------------------------------------------------------------------------------------------------------------------------------------------------------------------------------------------------------------------------|-----------------------------------------------------------------------------------------------------------------------------------------------------------------------------------------------------------------------------------------------------------------------------------------------------------------------------------------------------------------------------------------------------------------------|
| AF - DOWN | Intervertebral Disc (7447.58)<br>26 Concepts,<br>21 Genes     | acan (439.145470)<br>col2a1 (333.086640)<br>col9a3 (329.640001)<br>col10a1 (108.990959)<br>sox9 (83.463072)<br>col9a2 (69.342912)<br>wisp3 (55.708591)                                                                                                                                                                   | il6 (28.742186)<br>slc35a3 (21.272618)<br>krt8 (17.751198)<br>col11a2 (12.073874)<br>bcat1 (10.132739)<br>col11a1 (9.631237)<br>lrp5 (7.634491)                                                                                                                                                                | hapln1 (7.051835)<br>sox5 (6.006319)<br>fgfr3 (5.851093)<br>trpc3 (4.067831)<br>als2cr12 (3.923848)<br>prrg4 (3.638312)<br>slc27a1 (3.276362)                                                                                                                                       | intervertebral (3.098914)<br>catabolic (3.201843)<br>mmp-13 (3.231700)<br>disc (3.239936)<br>pulposus (3.290450)<br>mmp-3 (3.298470)<br>anabolic (3.302926)<br>ivd (3.585995)<br>adamts-4 (3.591431)<br>np (3.716188)<br>fibrosus (3.824740)<br>il-1b-induced (3.929351)<br>adamts (4.322705)                                                                                            | catabolism (4.327264)<br>matrix-degrading (4.353183)<br>orthop (4.440543)<br>metalloproteinase-13 (4.551878)<br>anabolism (4.569259)<br>endplate (4.573456)<br>res (4.579345)<br>motifs (4.587621)<br>subchondral (4.624898)<br>npcs (4.716056)<br>vertebral (4.800218)<br>meniscus (5.083920)<br>ppd (6.753984)                                                                                                      |
|           | Wnt/B-Catenin Signaling (2623.14)<br>34 Concepts,<br>44 Genes | sfrp5 (1456.741692)<br>lrp5 (933.530632)<br>frzb (526.320025)<br>rspo3 (227.275925)<br>wisp3 (72.350683)<br>nid2 (53.951897)<br>sox9 (52.013862)<br>col10a1 (39.635659)<br>snai2 (39.458553)<br>wnk2 (33.366337)<br>trpc3 (31.489595)<br>grem1 (31.135537)<br>acan (21.556143)<br>col2a1 (16.580297)<br>gng7 (12.564949) | crisp3 (12.019394)<br>cmtm5 (12.007081)<br>bcat1 (11.877178)<br>corin (11.570268)<br>tdrd1 (11.013653)<br>sox5 (9.960569)<br>fgfr1 (9.015105)<br>tnr (8.415435)<br>fat1 (7.429845)<br>il6 (7.105054)<br>col11a1 (6.994276)<br>st3gal6 (6.290501)<br>epha1 (6.254263)<br>rap1gap (5.969144)<br>fgfr3 (5.937330) | atp10a (5.679341)<br>chst11 (5.605750)<br>krtap5-1 (5.012391)<br>itga6 (4.652833)<br>sox8 (4.252587)<br>stc2 (4.221430)<br>chrdl2 (3.925473)<br>krt8 (3.923023)<br>trpm7 (3.841549)<br>azgp1 (3.661650)<br>lbh (3.390774)<br>fhl1 (3.244535)<br>klrk1 (3.203263)<br>vav3 (3.023654) | wnt (2.849254)<br>sfrp1 (2.881782)<br>sfrp2 (2.989890)<br>frizzled-related (3.089474)<br>sfrp4 (3.091842)<br>dkk1 (3.125666)<br>beta-catenin (3.262139)<br>b-catenin (3.285141)<br>frizzled (3.325955)<br>sfrp (3.328173)<br>dkk3 (3.367224)<br>canonical (3.429486)<br>methylation (3.457203)<br>dickkopf (3.608469)<br>wif1 (3.612718)<br>epigenetic (3.643629)<br>secreted (3.702506) | hypermethylation (3.758543)<br>wnts (3.767718)<br>silencing (3.953285)<br>methylation-specific (3.964054)<br>axin2 (4.018013)<br>wnt3a (4.028198)<br>methylated (4.128060)<br>dkk (4.196777)<br>lef1 (4.245415)<br>5-aza-2-deoxycytidine (4.324402)<br>receptor-related (4.354817)<br>sclerostin (4.534366)<br>sost (4.544350)<br>msp (4.834078)<br>co-receptors (4.849295)<br>silenced (5.045553)<br>tcf4 (5.723785) |
|           | Sox-Related 1 (4428.23)<br>14 Concepts,<br>24 Genes           | sox9 (1097.437975)<br>sox8 (751.562765)<br>sox5 (228.369160)<br>prrg4 (99.021026)<br>dock8 (80.831015)<br>tdrd1 (73.634575)<br>itga6 (34.781206)<br>col2a1 (32.233398)                                                                                                                                                   | snai2 (27.760488)<br>etv5 (25.787928)<br>acan (23.698189)<br>cmtm5 (16.461623)<br>atp10a (8.052100)<br>hpgds (6.889043)<br>tshr (5.967500)<br>wisp3 (5.850102)                                                                                                                                                 | col10a1 (5.252615)<br>fat1 (4.127250)<br>il6 (3.803410)<br>col9a2 (3.801224)<br>vit (3.674874)<br>s100b (3.503101)<br>krt8 (3.189543)<br>fga (3.178846)                                                                                                                             | sertoli (2.818841)<br>gonads (2.835392)<br>sry (2.919996)<br>sex-determining (2.970243)<br>amh (3.111122)<br>gonad (3.203031)<br>testes (3.249434)                                                                                                                                                                                                                                       | wt1 (3.302998)<br>dmrt1 (3.303239)<br>anti-mullerian (3.397446)<br>xy (3.525023)<br>y-box (4.752868)<br>transwell (6.244225)<br>cck8 (6.617245)                                                                                                                                                                                                                                                                       |
|           | Sox-Related 2 (4320.37)<br>17 Concepts,<br>30 Genes           | sox5 (1337.075779)<br>sox8 (1233.034463)<br>sox9 (1105.472865)<br>col2a1 (441.897232)<br>acan (386.170983)<br>krt8 (212.306563)<br>col10a1 (168.834048)<br>col11a2 (91.637519)<br>sfrp5 (76.942563)<br>rspo3 (69.160925)                                                                                                 | col9a2 (48.495728)<br>itga6 (47.768198)<br>snai2 (41.486594)<br>fxyd3 (41.078834)<br>corin (38.079511)<br>avpr1a (29.181418)<br>lrp5 (16.656286)<br>kcnj6 (14.263510)<br>fga (13.116907)<br>npl (11.847700)                                                                                                    | fgfr3 (11.803540)<br>etv5 (10.009109)<br>s100b (9.188300)<br>rs1 (6.539457)<br>atp10a (5.579282)<br>frzb (3.796979)<br>vav3 (3.454475)<br>fam19a5 (3.326232)<br>fat1 (3.308709)<br>grem1 (3.064578)                                                                                 | sox5 (3.780091)<br>sox6 (3.890635)<br>sox17 (4.081493)<br>sox (4.081561)<br>sox13 (4.128322)<br>hmg (4.297147)<br>sox4 (4.342014)<br>sox11 (4.381331)<br>sox7 (4.689096)                                                                                                                                                                                                                 | hmg-box (4.746614)<br>differentiating (5.169825)<br>foxa2 (5.585035)<br>trio (5.783954)<br>krt19 (6.065990)<br>gata6 (6.202158)<br>trios (6.595608)<br>family-based (6.660332)                                                                                                                                                                                                                                        |

Supplementary Table 2. Continued

| Tissue    | Theme                                                                             | Gene                                                                                                                                                                                                        |                                                                                                                                                                                                             |                                                                                                                                                                           | Concept                                                                                                                                                                                                                                                                                 |                                                                                                                                                                                                                                                                                    |
|-----------|-----------------------------------------------------------------------------------|-------------------------------------------------------------------------------------------------------------------------------------------------------------------------------------------------------------|-------------------------------------------------------------------------------------------------------------------------------------------------------------------------------------------------------------|---------------------------------------------------------------------------------------------------------------------------------------------------------------------------|-----------------------------------------------------------------------------------------------------------------------------------------------------------------------------------------------------------------------------------------------------------------------------------------|------------------------------------------------------------------------------------------------------------------------------------------------------------------------------------------------------------------------------------------------------------------------------------|
| AF - DOWN | BMP Signaling<br>(2716.19)<br>15 Concepts,<br>25 Genes                            | bmp5 (1553.623224)<br>grem1 (884.413269)<br>col10a1 (278.503791)<br>sox9 (231.508429)<br>col2a1 (144.430751)<br>chrdl2 (113.157899)<br>acan (67.914182)<br>lrp5 (31.788250)<br>sox5 (31.627408)             | snai2 (24.138709)<br>frzb (20.016681)<br>fgfr3 (16.288082)<br>wisp3 (9.933986)<br>etv5 (9.266946)<br>il6 (8.438558)<br>krt8 (6.850136)<br>epha1 (6.250484)<br>itga6 (5.833228)                              | ucma (5.757025)<br>btbd3 (5.616615)<br>hapln1 (4.954779)<br>sfrp5 (4.469579)<br>chst11 (4.224384)<br>sox8 (3.803242)<br>col11a2 (3.775045)                                | bmp (2.303506)<br>bmps (2.366603)<br>morphogenetic (2.423980)<br>gremlin (2.629356)<br>noggin (2.954818)<br>bmp-4 (3.127434)<br>bmp2 (3.183333)                                                                                                                                         | smad1 (3.195307)<br>bmp4 (3.287701)<br>bmp7 (3.330544)<br>morphogenic (3.413961)<br>bmp-7 (3.621154)<br>bmp-2 (3.632651)<br>bmp6 (3.987768)                                                                                                                                        |
|           | Musculoskeletal<br>Development<br>(2528.37)<br>24 Concepts,<br>29 Genes           | snai2 (1890.556804)<br>krt8 (109.072525)<br>nid2 (91.551024)<br>sox9 (59.505064)<br>wisp3 (51.712572)<br>fgfr3 (41.351001)<br>itga6 (40.545767)<br>ppr5 (34.475651)<br>sox5 (29.929998)<br>etv5 (28.076578) | sfrp5 (17.631963)<br>sox8 (17.137141)<br>plekhh1 (9.761309)<br>grem1 (9.468821)<br>flg2 (9.247792)<br>bmp5 (9.099204)<br>col11a1 (8.604426)<br>tubb2b (8.342068)<br>rap1gap (8.212438)<br>col2a1 (8.019902) | epha1 (6.695253)<br>il6 (6.426786)<br>fat1 (6.272435)<br>lbh (5.748247)<br>fxyd3 (5.676293)<br>s100b (5.110721)<br>stc2 (4.822166)<br>trpm7 (4.427145)<br>lrp5 (3.677255) | emt (2.597724)<br>e-cadherin (2.653815)<br>epithelial-mesenchymal (2.699951)<br>zeb1 (2.859652)<br>slug (2.947824)<br>zeb2 (2.999858)<br>snai1 (3.006083)<br>n-cadherin (3.042434)<br>epithelial-to-mesenchymal (3.05387)<br>snail (3.074674)<br>snail1 (3.170080)<br>twist1 (3.179278) | cdh1 (3.271992)<br>vimentin (3.297111)<br>twist (3.363778)<br>mesenchymal-like (3.677661)<br>repressors (3.957374)<br>migratory (4.170011)<br>vim (4.173914)<br>epithelial-like (4.457998)<br>abilities (5.292244)<br>hdac (5.432331)<br>ctcs (5.740111)<br>redundantly (6.779406) |
|           | Receptor-Linked<br>Signaling<br>Pathways<br>(2489.15)<br>24 Concepts,<br>21 Genes | fat1 (790.154755)<br>fgfr3 (310.476772)<br>als2cr12 (74.656645)<br>nid2 (43.459538)<br>rap1gap (39.810942)<br>rspo3 (39.738371)<br>snai2 (32.552946)                                                        | sfrp5 (30.560267)<br>etv5 (20.631642)<br>krt8 (18.733123)<br>sox9 (17.303148)<br>lrp5 (17.039307)<br>itga6 (10.684787)<br>col11a1 (7.096588)                                                                | tshr (7.070768)<br>wisp3 (6.298762)<br>col10a1 (4.115842)<br>trpv4 (3.892836)<br>fgfr1 (3.640222)<br>fxyd3 (3.554194)<br>il6 (3.520580)                                   | pik3ca (3.317900)<br>tp53 (3.370878)<br>cdkn2a (3.414186)<br>hras (3.494080)<br>mutational (3.548852)<br>notch1 (3.979337)<br>nras (4.054667)<br>casp8 (4.116906)<br>ctnnb1 (4.299525)<br>targetable (4.453009)<br>ep300 (4.590126)<br>hpv-negative (4.620245)                          | urothelial (4.654906)<br>hnscc (4.887960)<br>snapshot (4.964122)<br>kdm6a (5.116073)<br>oscc (5.126658)<br>stratify (5.214842)<br>tp63 (5.407127)<br>fusions (5.592004)<br>raf1 (5.723220)<br>escc (6.106634)<br>hematuria (6.111924)<br>voided (6.434859)                         |
|           | ECM-Related 2<br>(2293.94)<br>10 Concepts,<br>26 Genes                            | wisp3 (1667.098523)<br>ucma (207.944154)<br>tnr (202.489391)<br>col2a1 (102.657771)<br>col11a1 (96.692916)<br>hapln1 (95.402725)<br>acan (85.626622)<br>col27a1 (66.716517)<br>sox9 (48.045937)             | nid2 (45.284384)<br>itga6 (32.259187)<br>col10a1 (23.223605)<br>snai2 (18.483098)<br>col9a3 (13.869674)<br>sgalnact1 (10.310483)<br>grem1 (9.022684)<br>azgp1 (8.421314)<br>il6 (7.653133)                  | chst11 (5.600756)<br>bmp5 (4.642967)<br>krt8 (4.238248)<br>sfrp5 (4.193931)<br>sox5 (3.926891)<br>col9a2 (3.910873)<br>fgfr3 (3.832928)<br>fat1 (3.480678)                | matricellular (3.107626)<br>ctgf (3.141042)<br>ccn (3.232633)<br>matrix-associated (4.024893)<br>ccn2 (4.156716)                                                                                                                                                                        | ecm (4.229517)<br>sparc (4.386490)<br>tnrc (4.397243)<br>nov (4.397504)<br>tenascin (4.834538)                                                                                                                                                                                     |
|           | Chondrogenesis,<br>Wnt-Signaling<br>(2275.69)<br>4 Concepts,<br>23 Genes          | crisp3 (1710.852554)<br>wisp3 (445.574896)<br>scrg1 (141.768417)<br>crisp1d1 (99.633005)<br>chrdl2 (52.271158)<br>rspo3 (26.773032)<br>caps2 (26.666156)<br>tnr (18.441720)                                 | azgp1 (16.831110)<br>lrp5 (15.902629)<br>frzb (15.570485)<br>krtap5-1 (14.004551)<br>scin (13.518901)<br>corin (13.498041)<br>il6 (9.956003)<br>hpgds (7.421620)                                            | tshr (6.978162)<br>ucma (6.933201)<br>epha1 (6.600991)<br>krt8 (5.878047)<br>slc38a3 (5.560372)<br>col2a1 (4.943332)<br>vit (3.782643)                                    | cysteine-rich (2.873740)<br>secretory (3.350162)                                                                                                                                                                                                                                        | protein-3 (3.399517)<br>seminal (3.500861)                                                                                                                                                                                                                                         |

Supplementary Table 3. Genes, concepts, and themes associated with the ECM super cluster from DEGs upregulated in the NP. CompBio scores are shown in parenthesis.

| Tissue  | Theme                                                       | Gene                                                                                                                                                                            |                                                                                                                                                             |                                                                                                                                                 | Concept                                                                                                                                                                                                                       |                                                                                                                                                                                                                                             |
|---------|-------------------------------------------------------------|---------------------------------------------------------------------------------------------------------------------------------------------------------------------------------|-------------------------------------------------------------------------------------------------------------------------------------------------------------|-------------------------------------------------------------------------------------------------------------------------------------------------|-------------------------------------------------------------------------------------------------------------------------------------------------------------------------------------------------------------------------------|---------------------------------------------------------------------------------------------------------------------------------------------------------------------------------------------------------------------------------------------|
| NP - UP | Fibrosis (1759.04)<br>20 Concepts,<br>25 Genes              | acta2(543.482127)<br>tgfb1(328.721627)<br>tagln(158.121278)<br>cd68(108.087375)<br>samd3(59.966126)<br>kctd10(34.902421)<br>lox(28.679216)<br>dcn(26.434827)<br>prg4(18.419191) | scgn(18.195443)<br>adamts1(16.661173)<br>igfbp7(16.592299)<br>lcn2(13.956308)<br>id2(12.712265)<br>ly6c1(12.242559)<br>serpine2(9.477135)<br>sod3(8.671242) | gas1(6.607111)<br>sdc1(6.267595)<br>bgn(5.538995)<br>cck(4.677438)<br>apoe(3.929646)<br>ackr3(3.269373)<br>itgbl1(3.147234)<br>pdlim1(3.113920) | myofibroblasts(2.222609)<br>myofibroblast(2.299778)<br>actin(2.360990)<br>fibrotic(2.411990)<br>a-sma(2.446208)<br>tgfb1(2.496450)<br>a-smooth(2.536581)<br>asma(2.737290)<br>antifibrotic(2.774928)<br>profibrotic(2.816064) | pro-fibrotic(2.902964)<br>tgf-b1(2.930241)<br>anti-fibrotic(2.936146)<br>ctgf(3.032073)<br>alpha-smooth(3.115573)<br>factor-b1(3.128643)<br>ipf(3.446947)<br>desmin(3.846418)<br>proliferating(4.039757)<br>pcna(4.280178)                  |
|         | TGF-b (1412.27)<br>22 Concepts,<br>27 Genes                 | tgfb1(1399.798764)<br>acvr2a(533.754538)<br>samd3(261.819470)<br>acta2(120.642216)<br>id2(101.298345)<br>tagln(88.349069)<br>prg4(76.315109)<br>skor1(54.994660)                | bgn(28.849510)<br>lox(16.334643)<br>spns2(15.740377)<br>cd68(10.350145)<br>igfbp7(9.899773)<br>dcn(7.943128)<br>sdc1(7.686828)<br>ackr3(6.289405)           | serpine2(5.473657)<br>nupr1(4.743388)<br>gas1(4.305821)<br>defb14(4.269271)<br>slurp1(4.227742)<br>lcn2(3.454714)                               | smad2(2.315423)<br>smad(2.320045)<br>transforming(2.378728)<br>smad3(2.402950)<br>tgfb(2.463918)<br>smad4(2.599408)<br>smads(2.907649)<br>smad7(3.009349)<br>tgf-b(3.066623)<br>factor-beta(3.115825)<br>sb431542(3.163900)   | factor-b(3.187115)<br>canonical(3.227526)<br>tgfbeta(3.263062)<br>decapentaplegic(3.348883)<br>alk5(3.381910)<br>smad6(3.599656)<br>alk1(3.654841)<br>homolog(3.660054)<br>crosstalk(3.882857)<br>tgf-b-induced(4.517347)<br>il11(5.583286) |
|         | Smooth Muscle-Related (1324.78)<br>19 Concepts,<br>12 Genes | tagln(2096.651344)<br>acta2(361.256258)<br>tgfb1(31.361910)<br>cd68(28.033877)                                                                                                  | apoe(18.767829)<br>prg4(16.211574)<br>cck(12.940126)<br>lox(11.770680)                                                                                      | id2(9.728464)<br>hspb7(6.873854)<br>sod3(5.926330)<br>clu(4.090956)                                                                             | smooth(2.456770)<br>sm22(2.638581)<br>calponin(2.802465)<br>alpha-actin(2.827005)<br>myocardin(2.888935)<br>smcs(2.924173)<br>smc(2.925993)<br>srf(2.982518)<br>vsmc(3.115737)<br>vsmcs(3.169627)                             | muscle-specific(3.262970)<br>carg(3.274315)<br>dedifferentiated(3.436226)<br>sm22a(3.715338)<br>caldesmon(3.786593)<br>dedifferentiation(4.049818)<br>10t1(4.183518)<br>redifferentiation(4.982690)<br>gizzard(5.814655)                    |
|         | Transdifferentiation (1221.40)<br>4 Concepts,<br>10 Genes   | acta2(1201.777668)<br>tagln(1185.170385)<br>bgn(173.286795)<br>tgfb1(167.485548)                                                                                                | vcn(55.351273)<br>igfbp7(15.618597)<br>id2(10.688672)<br>cd68(7.710427)                                                                                     | lox(7.512100)<br>gcg(7.204661)                                                                                                                  | transgelin(2.978616)<br>tagln(3.087059)                                                                                                                                                                                       | transdifferentiated(3.235273)<br>transdifferentiation(3.248468)                                                                                                                                                                             |
|         | ECM-Related 1 (1190.28)<br>12 Concepts,<br>23 Genes         | adamts1(440.271904)<br>acta2(277.456040)<br>tgfb1(166.858693)<br>bgn(148.396875)<br>lcn2(63.277083)<br>igfbp7(55.321603)<br>lox(49.950387)<br>itgbl1(43.821205)                 | sdc1(34.431466)<br>dcn(29.377189)<br>prg4(24.495480)<br>tagln(22.555833)<br>clu(20.088853)<br>apoe(16.178455)<br>serpine2(14.976139)<br>vcn(12.868949)      | cd68(11.676116)<br>sod3(9.970021)<br>id2(6.748853)<br>ackr3(6.232635)<br>ogn(6.093047)<br>cck(5.915860)<br>gas1(5.713139)                       | mmp9(2.849815)<br>timp1(3.017778)<br>mmp3(3.107565)<br>mmp2(3.113644)<br>mmp10(3.115669)<br>mmp1(3.118569)                                                                                                                    | mmp13(3.283269)<br>timp4(3.396869)<br>timp3(3.442019)<br>serpina1(5.630654)<br>auroc(5.814984)                                                                                                                                              |
|         | ECM-Related 2 (883.72)<br>13 Concepts,<br>19 Genes          | acta2(1262.680517)<br>bgn(779.041887)<br>dcn(230.610606)<br>tgfb1(226.878857)<br>serpine2(137.289976)<br>vcn(136.838323)<br>lox(108.371968)<br>tagln(74.939099)                 | adamts1(43.938890)<br>prg4(21.874914)<br>clu(16.670202)<br>ogn(15.956992)<br>lcn2(14.992418)<br>sdc1(11.655266)<br>nupr1(11.137976)<br>id2(8.399842)        | sdc1(11.655266)<br>nupr1(11.137976)<br>id2(8.399842)<br>apoe(7.702383)<br>ackr3(7.058911)<br>cd68(4.771356)                                     | col1a1(2.670793)<br>col3a1(2.691863)<br>col1a2(3.037582)<br>col5a1(3.054936)<br>col11a1(3.236537)<br>col4a1(3.423685)<br>thbs2(3.480202)                                                                                      | fn1(3.505812)<br>col5a2(3.551780)<br>col6a3(3.610670)<br>serpine1(4.383907)<br>pdgfa(5.025298)<br>col6a1(5.106879)                                                                                                                          |

Supplementary Table 3. Continued

| Tissue  | Theme                                                | Gene                                                                                                                                                                                                                                                                                   |                                                                                                                                                                                                                                                                        |                                                                                                                                                                                                                              | Concept                                                                                          |                                                                                       |
|---------|------------------------------------------------------|----------------------------------------------------------------------------------------------------------------------------------------------------------------------------------------------------------------------------------------------------------------------------------------|------------------------------------------------------------------------------------------------------------------------------------------------------------------------------------------------------------------------------------------------------------------------|------------------------------------------------------------------------------------------------------------------------------------------------------------------------------------------------------------------------------|--------------------------------------------------------------------------------------------------|---------------------------------------------------------------------------------------|
| NP - UP | Signaling (819.07)<br>6 Concepts,<br>40 Genes        | cck(1265.035925)<br>tppp3(56.289035)<br>tgfb1(37.539936)<br>ackr3(35.793361)<br>itgbl1(28.001653)<br>ddit4(26.288177)<br>id2(21.366805)<br>samd3(19.725052)<br>acta2(18.605096)<br>gas1(16.611856)<br>serpine2(16.236403)<br>phlda1(16.124154)<br>nupr1(14.832093)<br>tagln(14.207048) | lox(13.421290)<br>ubxn10(12.290339)<br>acvr2a(12.255481)<br>adamts1(11.898321)<br>ly6c1(10.956534)<br>spns2(9.072666)<br>clu(8.424992)<br>sdc1(8.172304)<br>gcg(7.487287)<br>lcn2(7.444048)<br>apoe(7.433287)<br>cd68(7.166558)<br>htra4(7.044545)<br>sh3gl2(6.316121) | senp8(6.195442)<br>sod3(5.857229)<br>vcan(5.600875)<br>igfbp7(5.385919)<br>lrp8(4.620362)<br>prg4(4.403925)<br>bgn(4.352893)<br>slc6a6(4.290901)<br>clip1(3.984210)<br>dcn(3.784045)<br>pdlim1(3.762330)<br>slurp1(3.306712) | cck8(3.167105)<br>knockdown(3.177897)<br>regulating(3.420846)                                    | promoting(3.618110)<br>rt-qpcr(3.731739)<br>mtt(4.056493)                             |
|         | ECM-Related 3<br>(802.91)<br>6 Concepts,<br>18 Genes | tgfb1(1356.765903)<br>acta2(652.433641)<br>tagln(200.977770)<br>acvr2a(141.942900)<br>dcn(140.696523)<br>gas1(87.478387)                                                                                                                                                               | adamts1(63.513933)<br>bgn(45.083365)<br>nupr1(41.450740)<br>lox(23.598303)<br>igfbp7(20.170268)<br>clu(15.991197)                                                                                                                                                      | id2(11.406870)<br>cd68(9.790247)<br>ogn(7.511690)<br>nptx2(6.335244)<br>vcan(5.724098)<br>lcn2(4.654188)                                                                                                                     | tgfb2(3.232275)<br>tgfb3(3.534521)<br>tgfb3(3.595887)                                            | sparc(3.924471)<br>osteonectin(3.971362)                                              |
|         | ECM Formation<br>(760.29)<br>9 Concepts,<br>12 Genes | acta2(2115.127347)<br>tagln(881.061611)<br>tgfb1(530.331038)<br>acvr2a(372.990823)                                                                                                                                                                                                     | bgn(60.037487)<br>dcn(48.670771)<br>lox(40.199123)<br>cd68(25.540694)                                                                                                                                                                                                  | ogn(9.197675)<br>vcan(7.595531)<br>apoe(6.997491)<br>sod3(3.704063)                                                                                                                                                          | myh11(2.759659)<br>acta2(2.869817)<br>fbn1(3.315965)<br>dissections(3.316387)<br>tgfb1(3.369713) | tgfb2(3.450191)<br>bicuspid(4.220093)<br>a-actin(4.772665)<br>multisystemic(5.131694) |

Supplementary Table 4. Genes, concepts, and themes associated with the ECM super cluster from DEGs downregulated in the NP. CompBio scores are shown in parenthesis

| Tissue    | Theme                                                        | Gene                |                       |                            | Concept                  |                              |
|-----------|--------------------------------------------------------------|---------------------|-----------------------|----------------------------|--------------------------|------------------------------|
| NP - DOWN | Articular Cartilage<br>(5237.08)<br>68 Concepts,<br>36 Genes | acan(979.269576)    | oaf(37.386938)        | azgp1(5.869103)            | col2a1(3.028827)         | mmp3(4.125722)               |
|           |                                                              | sox9(721.126969)    | lrp5(28.221855)       | arrdc4(5.692985)           | aggrecan(3.036804)       | ivd(4.150318)                |
|           |                                                              | hapln1(258.270544)  | krt8(24.788770)       | lrig1(5.259064)            | sox9(3.070992)           | sulfated(4.259454)           |
|           |                                                              | col11a1(250.999527) | fbxo32(20.204360)     | fasn(4.518206)             | cartilage(3.073792)      | cartilage-specific(4.331201) |
|           |                                                              | chst3(72.894356)    | p4ha3(20.168536)      | sema3d(4.202030)           | chondrocytes(3.112391)   | chondroitin(4.333844)        |
|           |                                                              | frzb(71.168042)     | sox12(15.678582)      | s100b(3.667279)            | acan(3.118336)           | sulfate(4.339159)            |
|           |                                                              | fzd2(69.634257)     | creb3l2(10.941130)    | sik3(3.643213)             | articular(3.127973)      | gags(4.355755)               |
|           |                                                              | fgfr3(69.251393)    | gas7(10.193341)       | cd36(3.558735)             | chondrocyte(3.162398)    | degenerated(4.444788)        |
|           |                                                              | slc26a2(66.797074)  | kcnip3(8.743618)      | nr2f2(3.498712)            | proteoglycan(3.232657)   | versican(4.450733)           |
|           |                                                              | wnt16(50.144751)    | igfbp1(7.866324)      | krt20(3.293930)            | chondrogenic(3.236732)   | ihh(4.467454)                |
|           |                                                              | gpc4(49.409809)     | etv5(6.145413)        | epha2(3.182975)            | mmp13(3.395868)          | fibrosus(4.492794)           |
|           |                                                              | spp1(38.644301)     | h2-q4(5.935605)       | slc38a2(3.170989)          | ecm(3.398651)            | mmp-3(4.549018)              |
|           |                                                              |                     |                       |                            | osteoarthritis(3.404458) | mmp9(4.662965)               |
|           |                                                              |                     |                       |                            | oa(3.553580)             | heparan(4.687490)            |
|           |                                                              |                     |                       |                            | chondrogenesis(3.558764) | pericellular(4.733570)       |
|           |                                                              |                     |                       |                            | osteoarthritic(3.645061) | gdf5(4.758046)               |
|           |                                                              |                     |                       |                            | col10a1(3.654130)        | notochordal(4.799123)        |
|           |                                                              |                     |                       |                            | adamts5(3.688935)        | frzb(4.836488)               |
|           |                                                              |                     |                       |                            | cartilaginous(3.703124)  | anabolism(4.882784)          |
|           |                                                              |                     |                       |                            | proteoglycans(3.714567)  | annulus(4.886569)            |
|           |                                                              |                     |                       |                            | intervertebral(3.765803) | matrix-degrading(4.891543)   |
|           |                                                              |                     |                       |                            | mmp-13(3.842129)         | mmp2(4.947659)               |
|           |                                                              |                     |                       |                            | safranin(3.876110)       | vcan(4.949059)               |
|           |                                                              |                     |                       |                            | pulposus(3.977786)       | pthrp(5.003931)              |
|           |                                                              |                     |                       |                            | endochondral(3.997455)   | timp1(5.106374)              |
|           |                                                              |                     |                       |                            | meniscus(4.021928)       | sulfation(5.120412)          |
|           |                                                              |                     |                       |                            | pellet(4.032542)         | npcs(5.310798)               |
|           |                                                              |                     |                       |                            | anabolic(4.050971)       | nscs(5.328656)               |
|           |                                                              |                     | mmp1(4.070421)        | timp3(5.382248)            |                          |                              |
|           |                                                              |                     | alcian(4.071255)      | frizzled-related(5.528478) |                          |                              |
|           |                                                              |                     | micromass(4.083292)   | cytoarchitecture(5.734467) |                          |                              |
|           |                                                              |                     | catabolic(4.104601)   | wingless-type(5.745214)    |                          |                              |
|           |                                                              |                     | hyaluronan(4.107871)  | mmp7(5.769034)             |                          |                              |
|           |                                                              |                     | subchondral(4.116266) | neuropil(6.028149)         |                          |                              |

Supplementary Table 4. Continued

| Tissue    | Theme                                                           | Gene                 |                    |                    | Concept                        |                              |
|-----------|-----------------------------------------------------------------|----------------------|--------------------|--------------------|--------------------------------|------------------------------|
| NP - DOWN | Chondrogenic Regulation 1 (2934.92)<br>34 Concepts,<br>30 Genes | spp1(1142.847146)    | nr2f2(10.550128)   | caskin1(4.757372)  | osteocalcin(2.826012)          | col(3.960904)                |
|           |                                                                 | sox9(302.096019)     | hapln1(9.933787)   | cd80(4.163214)     | osteogenic(2.867198)           | bmp-2(3.962073)              |
|           |                                                                 | acan(178.523570)     | etv5(8.914981)     | igfbp1(4.092491)   | runx2(2.910324)                | mc3t3-e1(4.172151)           |
|           |                                                                 | lrp5(59.399570)      | plcb4(8.202968)    | gas7(4.092242)     | opn(3.004970)                  | scaffold(4.271630)           |
|           |                                                                 | wnt16(45.482908)     | oaf(7.747307)      | slc26a2(4.071627)  | ocn(3.013820)                  | cbfa1(4.286769)              |
|           |                                                                 | lmo4(45.394951)      | slc44a2(7.036027)  | krt8(3.583942)     | runt-related(3.050723)         | dlx5(4.360384)               |
|           |                                                                 | frzb(33.848578)      | arrdc4(6.885272)   | slc25a14(3.578921) | osterix(3.127429)              | col1(4.368243)               |
|           |                                                                 | fgfr3(29.682851)     | il7(6.046551)      | myh11(3.221717)    | osteopontin(3.152872)          | bmp4(4.523177)               |
|           |                                                                 | ubtd2(17.484032)     | rgma(5.422780)     | col11a1(3.187964)  | alizarin(3.255732)             | protein-2(4.531577)          |
|           |                                                                 | wdr83(11.310384)     | mid1(4.916818)     | fzd2(3.016568)     | bsp(3.277159)                  | bmsc(4.548817)               |
|           |                                                                 |                      |                    |                    | sialoprotein(3.369443)         | msx2(4.840270)               |
|           |                                                                 |                      |                    |                    | osteoblastic(3.394882)         | calvaria(4.932179)           |
|           |                                                                 |                      |                    |                    | bmp2(3.530151)                 | multilineage(4.935040)       |
|           |                                                                 |                      |                    |                    | osx(3.604891)                  | bmp7(5.239681)               |
|           |                                                                 |                      |                    |                    | mineralized(3.643335)          | cell-derived(5.454350)       |
|           |                                                                 |                      |                    |                    | mscs(3.780796)                 | bm-mscs(5.639325)            |
|           |                                                                 |                      |                    |                    | bmscs(3.853095)                | msx1(5.744151)               |
|           | Mesenchyme Morphogenesis (2764.70)<br>32 Concepts,<br>43 Genes  | sox9(965.022677)     | sik3(21.660849)    | plcb4(7.337551)    | embryos(3.834227)              | morpholino(5.110370)         |
|           |                                                                 | acan(464.414839)     | gpc4(21.636583)    | plet1(7.047377)    | morphogenesis(4.206942)        | ectoderm(5.186358)           |
|           |                                                                 | sox12(235.031933)    | wnt16(25.954594)   | slc12a7(6.585805)  | mesenchyme(4.214995)           | sry-related(5.218199)        |
|           |                                                                 | cdc42se1(148.808710) | slc26a2(19.510742) | atp1a1(8.002270)   | embryogenesis(4.231860)        | endoderm(5.250290)           |
|           |                                                                 | nr2f2(107.091619)    | epha3(17.847310)   | frzb(6.360604)     | sox(4.270485)                  | gastrulation(5.302402)       |
|           |                                                                 | fgfr3(83.153218)     | s100b(17.807652)   | mid1(6.345077)     | specification(4.359953)        | cooperatively(5.404704)      |
|           |                                                                 | chst3(74.966214)     | sh3tc2(17.529598)  | krt8(5.399472)     | bud(4.373879)                  | trio(5.453748)               |
|           |                                                                 | rgma(60.273225)      | creb3l2(13.432193) | spp1(5.279942)     | patterning(4.377381)           | chondrocytic(5.477692)       |
|           |                                                                 | slco3a1(56.264387)   | hoxd10(12.392281)  | dhrs3(4.355529)    | sox5(4.455757)                 | atdc5(5.556001)              |
|           |                                                                 | etv5(51.740829)      | mgat4a(12.022728)  | plxna2(4.332246)   | sox6(4.465105)                 | fgf10(5.595562)              |
|           |                                                                 | sema3d(36.705984)    | lrp5(12.002836)    | gas7(4.324903)     | zebrafish(4.505183)            | branching(5.605023)          |
|           |                                                                 | celsr1(34.288792)    | fzd2(11.250505)    | nck2(3.669056)     | craniofacial(4.508340)         | alpha1(5.791300)             |
|           |                                                                 | rdh10(31.422267)     | orc6(8.820331)     | krt20(3.240671)    | hmg(4.924500)                  | stature(5.955483)            |
|           |                                                                 | lmo4(28.863496)      | dmrta1(8.237332)   | epha2(3.102100)    | arches(4.967528)               | shox(6.373351)               |
|           |                                                                 | col11a1(24.958204)   |                    |                    | sox10(5.009034)                | spondyloepiphyseal(6.644939) |
|           |                                                                 |                      |                    |                    | chondrocyte-specific(5.069558) | 15q26(6.902245)              |
|           | Proteoglycan-Related (2615.64)<br>17 Concepts,<br>28 Genes      | acan(832.648632)     | wnt16(64.352947)   | abr(8.518360)      | sparc(3.506177)                | dcn(4.831851)                |
|           |                                                                 | col11a1(827.848613)  | tspan7(40.773364)  | fhl1(8.395059)     | col3a1(3.529294)               | sp7(4.889848)                |
|           |                                                                 | spp1(496.548817)     | fkbp14(39.417158)  | masp1(7.087041)    | col1a1(3.545889)               | tnc(4.912705)                |
|           |                                                                 | sparcl1(325.088076)  | fzd2(29.225721)    | igfbp1(6.293580)   | spp1(3.800689)                 | thbs1(5.122691)              |
|           |                                                                 | sox9(214.843419)     | nid2(24.037694)    | creb3l2(5.622775)  | fn1(3.819515)                  | bone-related(5.283941)       |
|           |                                                                 | hapln1(113.984761)   | cd36(19.938055)    | azgp1(4.953714)    | alpl(4.145434)                 | bgn(5.458915)                |
|           |                                                                 | frzb(111.601840)     | reln(16.763203)    | tshr(4.664321)     | col1a2(4.236811)               | eng(5.810089)                |
|           |                                                                 | myh11(81.240501)     | fasn(12.981217)    | epha2(3.377696)    | bglap(4.535495)                | matricellular(5.997198)      |
|           |                                                                 | lrp5(79.643585)      | fgfr3(11.088998)   |                    | postn(4.619479)                |                              |
|           |                                                                 | pxn(67.122952)       | krt8(9.446436)     |                    |                                |                              |



Supplementary Table 4. Continued

| Tissue    | Theme                                                                | Gene               |                   |                    | Concept                    |                          |
|-----------|----------------------------------------------------------------------|--------------------|-------------------|--------------------|----------------------------|--------------------------|
| NP - DOWN | Cell Proliferation<br>(2041.96)<br>20 Concepts,<br>42 Genes          | fgfr3(1525.548436) | snx10(19.834352)  | gpc4(6.084653)     | 414(5.238578)              | dwarfism(4.738539)       |
|           |                                                                      | gcdh(152.472373)   | fzd2(18.846392)   | nck2(6.078230)     | fibroblast(3.444906)       | syndromic(4.876667)      |
|           |                                                                      | nid2(132.476042)   | inpp4a(16.706031) | s100b(5.487875)    | fgfr3(3.475395)            | twist1(5.122779)         |
|           |                                                                      | orc6(116.339476)   | oaf(15.287090)    | krt8(5.261698)     | fgf(3.565767)              | fgf-2(5.163702)          |
|           |                                                                      | etv5(96.196498)    | epha2(15.255464)  | myh11(4.902799)    | fgfr2(3.641585)            | ccnd1(5.267434)          |
|           |                                                                      | gjc3(69.314718)    | epha3(14.041058)  | atp1a1(4.828203)   | fgfr(3.687335)             | nonsyndromic(5.312449)   |
|           |                                                                      | sox9(61.932313)    | spp1(13.772386)   | fasn(4.387618)     | fgfr1(3.699220)            | macrocephaly(5.805964)   |
|           |                                                                      | acan(35.660583)    | lrp5(10.537150)   | rxfp2(4.272634)    | craniosynostosis(4.091315) | maf(5.902357)            |
|           |                                                                      | gas7(29.946328)    | frzb(9.906477)    | arf2(3.606769)     | fgf2(4.372765)             | mgus(6.320143)           |
|           |                                                                      | col11a1(28.740631) | sik3(9.645166)    | igfbp1(3.496204)   | fgfs(4.462144)             | post-natal(6.615423)     |
|           |                                                                      | slc9a7(28.707243)  | wnt16(9.367909)   | tshr(3.271951)     |                            |                          |
|           |                                                                      | tspan7(24.055831)  | krt20(9.138376)   | abr(3.229060)      |                            |                          |
|           |                                                                      | sox12(23.689190)   | hoxd10(9.054512)  | nr2f2(3.219847)    |                            |                          |
|           |                                                                      | slc26a2(20.018878) | cdkl5(7.284404)   | dsc2(3.073734)     |                            |                          |
|           | Chondrogenic<br>Regulation 2<br>(1808.37)<br>6 Concepts,<br>18 Genes | sox9(359.631350)   | acan(49.756819)   | slc26a2(24.017946) | nkx3(3.879572)             | skeletogenesis(5.275678) |
|           |                                                                      | krt20(226.962318)  | fgfr3(47.460462)  | lrp5(23.521571)    | c3h10t1(5.014052)          | cribriform(5.654027)     |
|           |                                                                      | sox12(183.102048)  | nr2f2(28.772398)  | spp1(22.828696)    | shh(5.187445)              | amacr(5.690433)          |
|           |                                                                      | krt8(112.424610)   | hoxd10(28.262805) | etv6(9.178086)     |                            |                          |
|           |                                                                      | sik3(94.898494)    | etv5(26.101850)   | epha3(8.328017)    |                            |                          |
|           |                                                                      | fasn(68.953575)    | mid1(25.697878)   | wnt16(5.338947)    |                            |                          |
